# Supplementary material
Source: PubMed Central journal article supplement (PMC7018397)

## Supplementary Online Content

Stevens K, Davey C, Lassig AA. Association of weekly protected nonclinical time with resident physician burnout and well-being. *JAMA Otolaryngol Head Neck Surg*. Published online January 2, 2020. doi:10.1001/jamaoto.2019.3654

**eTable.** Baseline and Week 32 Mini-Z Responses

**eFigure 1.** Use of Weekly Nonclinical Time by Residents

**eFigure 2.** Flowchart of Resident Participation in Weekly Intervention While on Intervention Phase

This supplementary material has been provided by the authors to give readers additional information about their work.

**eTable. Baseline and Week 32 Mini-Z Responses**

| Mini Z item and response options                                                                    | N (%) with each response |           |
|-----------------------------------------------------------------------------------------------------|--------------------------|-----------|
|                                                                                                     | Week 0 (baseline)        | Week 32   |
| <b>Q1: Job Satisfaction</b>                                                                         |                          |           |
| Strongly disagree                                                                                   | 1 (5.3)                  | 0 (0.0)   |
| Disagree                                                                                            | 1 (5.3)                  | 0 (0.0)   |
| Neither agree nor disagree                                                                          | 1 (5.3)                  | 1 (5.3)   |
| Agree                                                                                               | 12 (63.2)                | 15 (78.9) |
| Strongly agree                                                                                      | 4 (21.1)                 | 3 (15.8)  |
| <b>Q2: Job stress</b>                                                                               |                          |           |
| Strongly disagree                                                                                   | 0 (0.0)                  | 1 (5.3)   |
| Disagree                                                                                            | 2 (10.5)                 | 1 (5.3)   |
| Neither agree nor disagree                                                                          | 6 (31.6)                 | 9 (47.4)  |
| Agree                                                                                               | 7 (36.8)                 | 7 (36.8)  |
| Strongly agree                                                                                      | 4 (21.1)                 | 1 (5.3)   |
| <b>Q3: Burnout</b>                                                                                  |                          |           |
| I enjoy my work. I have no symptoms of burnout.                                                     | 0 (0.0)                  | 3 (15.8)  |
| I am under stress and don't always have as much energy as I did but I don't feel burned out.        | 12 (63.2)                | 12 (63.2) |
| I am definitely burning out and have one or more symptoms of burnout.                               | 6 (31.6)                 | 4 (21.1)  |
| The symptoms of burnout that I'm experiencing won't go away. I think about work frustrations a lot. | 1 (5.3)                  | 0 (0.0)   |
| I feel completely burned out. I am at the point where I may need to seek help.                      | 0 (0.0)                  | 0 (0.0)   |
| <b>Q4: Control over workload</b>                                                                    |                          |           |
| Poor                                                                                                | 3 (15.8)                 | 0 (0.0)   |
| Marginal                                                                                            | 4 (21.1)                 | 2 (10.5)  |
| Satisfactory                                                                                        | 9 (47.4)                 | 11 (57.9) |
| Good                                                                                                | 3 (15.8)                 | 6 (31.6)  |
| Optimal                                                                                             | 0 (0.0)                  | 0 (0.0)   |
| <b>Q5: Sufficient time for documentation</b>                                                        |                          |           |
| Poor                                                                                                | 2 (10.5)                 | 1 (5.3)   |
| Marginal                                                                                            | 8 (42.1)                 | 3 (15.8)  |
| Satisfactory                                                                                        | 7 (36.8)                 | 9 (47.4)  |
| Good                                                                                                | 2 (10.5)                 | 5 (26.3)  |
| Optimal                                                                                             | 0 (0.0)                  | 1 (5.3)   |
| <b>Q9: Time spent at home on EMR</b>                                                                |                          |           |
| Excessive                                                                                           | 0 (0.0)                  | 0 (0.0)   |
| Moderately High                                                                                     | 7 (36.8)                 | 5 (26.3)  |
| Satisfactory                                                                                        | 5 (26.3)                 | 7 (36.8)  |
| Modest                                                                                              | 5 (26.3)                 | 5 (26.3)  |
| Minimal/None                                                                                        | 2 (10.5)                 | 2 (10.5)  |

**eFigure 1.** Use of Weekly Nonclinical Time by Residents

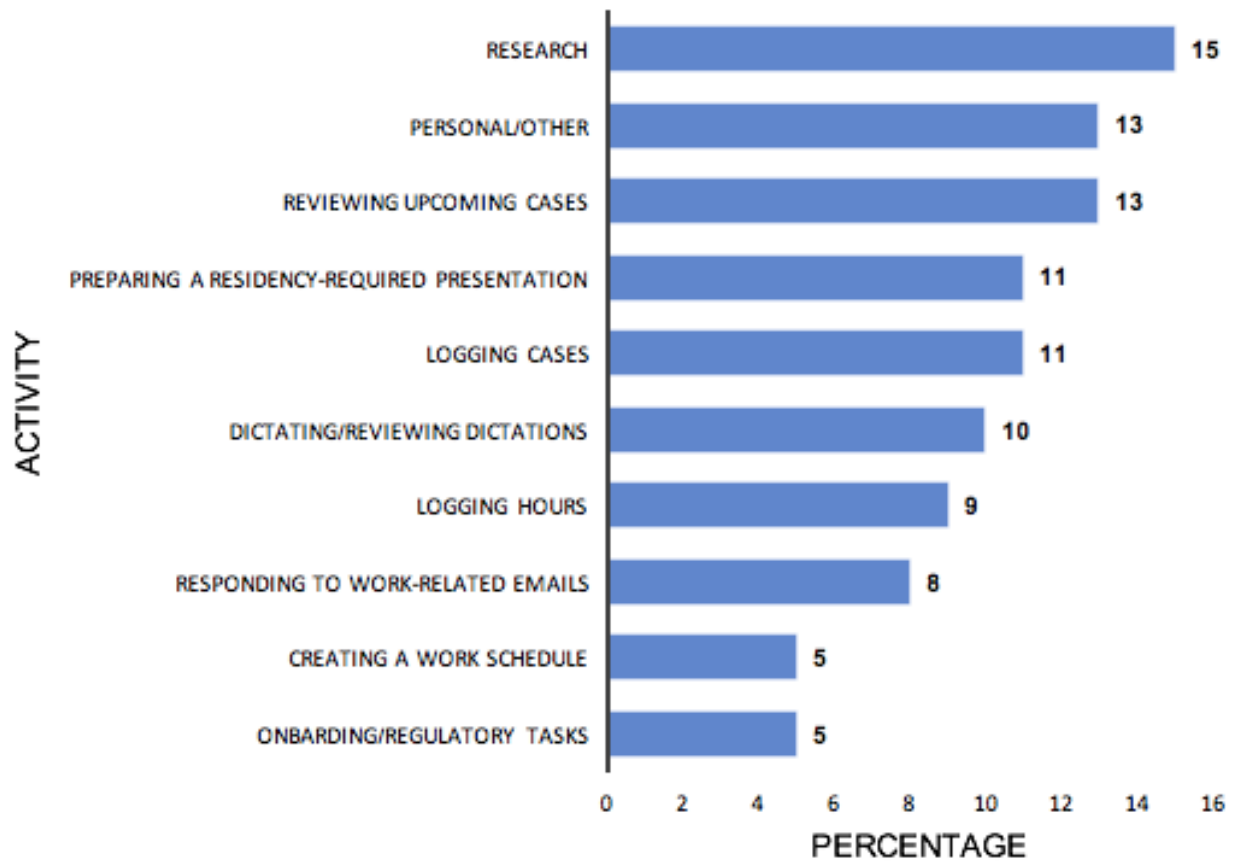

Of note, if subjects selected “personal/other”, they were asked to further describe how they spent their time. Free form responses were grouped into personal health/wellness (5%), studying (2.8%), running errands (1.4%), post-residency job search (1.2%), department-related administrative activities (1%), and no response (1.7%).

**eFigure 2.** Flowchart of Resident Participation in Weekly Intervention While on Intervention Phase

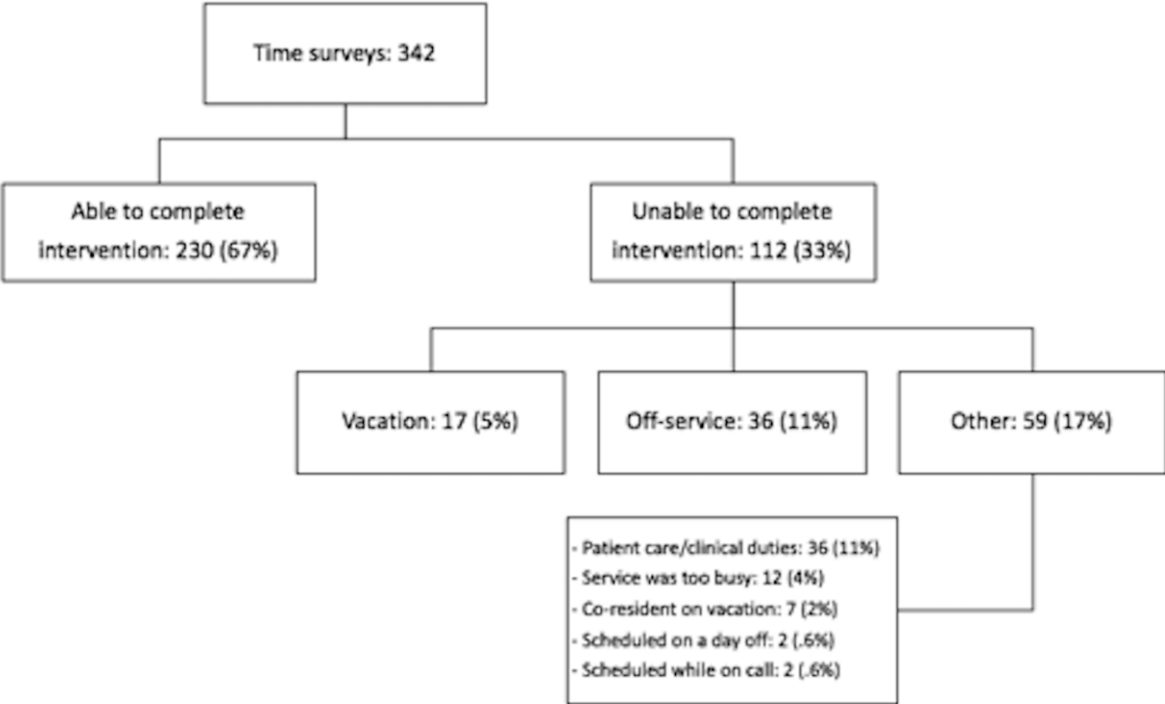

Supplement: jamaotolaryngolheadnecksurg-146-168-s001.pdf [file jamaotolaryngolheadnecksurg-146-168-s001.pdf]
